# Supplementary material
Source: Springer Nature journal article supplement (https://www.springermedizin.de/resource/supplementary/12943_2009_516_MOESM6_ESM.pdf/9554404)

Activity relative to internal control

3  
2.5  
2  
1.5  
1  
0.5  
0

□ p65  
■ p50

Ad/AH neo    Ad/AH neo + TNF    Ad/AH EBNA1    Ad/AH EBNA1 + TNF    Ad/AH EBV    Ad/AH EBV + TNF    C666-1    C666-1 + TNF

\*

\*

\*

\*

\*

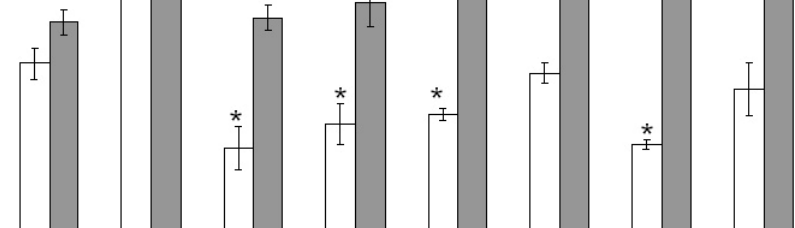

Supplement: MOESM6 [file 9554404]
